1 **Dorsal raphe nuclei to anterior cingulate cortex 5-HTergic neural circuit is implicated**  
2 **in consolation-like behaviors and sociability in mandarin voles**

3

4 Lai-Fu Li<sup>1,2\*</sup>, Li-Zi Zhang<sup>1,\*</sup>, Zhi-Xiong He<sup>1</sup>, Wei Yuan<sup>1,3</sup>, Huan Ma<sup>1</sup>, Yu-Feng Xun<sup>1</sup>,  
5 Wen-Juan Hou<sup>1</sup>, Yi-Tong Li<sup>1</sup>, Zi-Jian Lv<sup>1</sup>, Rui Jia<sup>1</sup>, Fa-Dao Tai<sup>1,#</sup>

6

7 *<sup>1</sup>Institute of Brain and Behavioral Sciences, College of Life Sciences, Shaanxi Normal University,*  
8 *Xi'an, 710062, China*

9 *<sup>2</sup>College of Life Sciences, Nanyang Normal University, Nanyang, 473061, China*

10 *<sup>3</sup>Provincial Key Laboratory of Acupuncture and Medications, Shaanxi University of Chinese*  
11 *Medicine, Xianyang 712046, China*

12

13 Running title: DR→ACC 5-HTergic neural circuit modulate consolation

14

15 \*The first two authors contributed equally to this article.

16 #Corresponding authors: Fa-Dao Tai, PhD, Professor, College of Life Sciences, Shaanxi  
17 Normal University, Xi'an, 710062, China, E-mail: taifadao@snnu.edu.cn

18 **ABSTRACT**

19 Consolation is a common empathetic response in humans and some social animals, but  
20 the neural mechanisms underlying this behavior are not well characterized. Here, by  
21 using socially monogamous mandarin voles, we found that optogenetic or chemogenetic  
22 inhibition of 5-HTergic neurons in the dorsal raphe nuclei (DR) or optogenetic inhibition  
23 of 5-HT terminals in the anterior cingulate cortex (ACC) significantly decreased the  
24 allogrooming time in the consolation test and reduced sociability in the three-chamber  
25 test. Fiber photometry results showed that the release of 5-HT within the ACC and the  
26 activity of DR neurons were significantly increased when allogrooming and social  
27 approaching occurred. Finally, we found that the activation of 5-HT<sub>1A</sub> receptors in the  
28 ACC was sufficient to reverse consolation and sociability deficits induced by the  
29 chemogenetic inhibition of 5-HTergic neurons in the DR. Our study provided first direct  
30 evidence that DR→ACC 5-HTergic neural circuit is implicated in consolation-like  
31 behaviors and sociability in mandarin voles.

32

33 **Keywords:** Consolation; Empathy; Anterior cingulate cortex; Dorsal raphe nuclei;  
34 Serotonin; Fiber photometry

## 35 INTRODUCTION

36 Consolation behavior, which is referred to as increased in affiliative contact toward a  
37 distressed individual by an uninvolved bystander, is an important component of the  
38 social capabilities of humans (de Waal & Preston, 2017; Field, Diego, & Hernandez-Reif,  
39 2009). Impaired consolation or empathy has been frequently observed in many  
40 psychiatric diseases, such as depression, autism, and schizophrenia (Young, Parsons,  
41 Stein, & Kringelbach, 2015). As a higher level of empathy-like behavior, consolation has  
42 long been assumed to exist in species possessing complex cognitive functions, such as  
43 humans, apes, dolphins and elephants (de Waal & Preston, 2017; Perez-Manrique &  
44 Gomila, 2018); but recent studies have indicated that it also exists in some socially-lived  
45 rodents, such as prairie voles (Burkett et al., 2016), mandarin voles (L. F. Li, Yuan, He,  
46 Wang, et al., 2019) and rats (Knapska, Mikosz, Werka, & Maren, 2010).

47 Currently, studies of the neural mechanisms underlying consolation and other  
48 empathy-like behaviors primarily focus on oxytocin systems (Burkett et al., 2016; L. F. Li,  
49 Yuan, He, Wang, et al., 2019). However, as a complex social behavior, consolation may  
50 require the coordinated actions of numerous neuromodulators and neurotransmitters.  
51 5-HT is an evolutionarily ancient neurotransmitter that has long been implicated in a  
52 variety of emotional disorders (Faye et al., 2020; Garcia-Garcia et al., 2018; Meneses &  
53 Liy-Salmeron, 2012). According to recent studies, 5-HT transmission is also involved in a  
54 series of social behaviors such as social interaction (Walsh et al., 2018), social reward and  
55 aggression (Dolen, Darvishzadeh, Huang, & Malenka, 2013). Regarding empathy, a  
56 recent study revealed an association between the salivary 5-HT levels and the empathic  
57 abilities of people (Matsunaga et al., 2017); a polymorphism in the promoter region of the  
58 serotonin transporter gene has been linked to individual differences in empathy (Gyurak  
59 et al., 2013); MDMA ( $\pm$ 3,4-methylenedioxymethamphetamine, better known as the  
60 recreational drug “ecstasy”), which is well known to stimulate a feeling of closeness and  
61 empathy in its users (Carlyle et al., 2019), had been confirmed to robustly increase the

62 release of 5-HT in an activity-independent manner (Heifets & Malenka, 2016). In animal  
63 studies, Kim, et al. found that microinjection of 5-HT into the anterior cingulate cortex  
64 (ACC) impaired vicarious fear and altered the regularity of neural oscillations in mice  
65 (Kim et al., 2014). Our recent study indicated that 5-HT<sub>1A</sub> receptors within the ACC are  
66 involved in consolation deficits induced by chronic social defeat stress in mandarin voles  
67 (L. F. Li, Yuan, He, Ma, et al., 2019). However, to our knowledge, direct evidence for an  
68 association between 5-HT and consolation has yet to be obtained.

69 Dorsal raphe nuclei (DR) are a main source of 5-HT neurons and provide 70% of  
70 5-HTergic projections in the forebrain (Fu et al., 2010; Luo, Zhou, & Liu, 2015). DR  
71 5-HTergic neurons form dense, broad and bidirectional neural connections with a broad  
72 range of forebrain and limbic structures, including the ACC (Celada, Puig, & Artigas,  
73 2013; Charnay & Leger, 2010), which is a central hub for various types of empathy-like  
74 behaviors. Therefore, direct modulation of the DR→ACC 5-HTergic circuit to investigate  
75 its function role in consolation-like behaviors is interesting and meaningful.

76 The released 5-HT binds to pre- and postsynaptic receptors. To date, at least 14  
77 different 5-HT receptor subtypes have been identified in the brain (Artigas, 2013).  
78 Among which, 5HT<sub>1A</sub>R and 5HT<sub>2A</sub>R are the two main subtypes that are expressed at  
79 high levels in the prefrontal cortex (Carhart-Harris & Nutt, 2017; Santana & Artigas,  
80 2017). The distribution, signaling pathways and functions of these two receptors are  
81 substantially different, and both receptors play critical roles in modulating cortical  
82 activity and neural oscillations (Celada et al., 2013). Previous studies had indicated that  
83 5HT<sub>2A</sub>R gene single nucleotide polymorphisms are associated with empathy-related  
84 social communication abilities (Gong, Liu, Blue, Li, & Zhou, 2015), and a 5HT<sub>2A</sub>R  
85 agonist increases emotional empathic ability (Dolder, Grunblatt, Muller, Borgwardt, &  
86 Liechti, 2017). However, in animal studies by Kim, et al., blockade of serotonin receptors  
87 in the ACC did not affect the observational fear response in mice (Kim et al., 2014).  
88 Clearly, the specific functions of 5HT<sub>1A</sub>R and 5HT<sub>2A</sub>R in empathy-like behaviors still

89 require further examination.

90 The mandarin vole (*Microtus mandarinus*) is a socially monogamous rodent that is  
91 widely distributed across China (He et al., 2019). As shown in our previous studies, this  
92 species is capable of displaying consolation-like behaviors upon exposure to a distressed  
93 partner (L. F. Li, Yuan, He, Ma, et al., 2019; L. F. Li, Yuan, He, Wang, et al., 2019). In the  
94 present study, we first investigated the function of DR→ACC 5-HTergic circuits in  
95 consolation-like behaviors using optogenetic and chemogenetic approaches. To provide  
96 more direct evidence, we then monitored ACC 5-HT release and DR neuron activities  
97 during this behavior by using in vivo fiber photometry. Finally, we used chemogenetics  
98 plus pharmacological approaches investigated which types of 5-HT receptor in the ACC  
99 are involved in consolation-like behaviors in Mandarin Voles. In order to investigate any  
100 potential sex differences during these processes, both male and female subjects were  
101 involved in our study.

## 102 **RESULTS**

### 103 **Optogenetic inhibition of DR 5-HT neurons in the DR→ACC neural circuit impaired** 104 **consolation and reduced sociability**

105 We first determined the 5-HTergic projection relationship between the DR and ACC in  
106 Mandarin Voles. For this experiment, the retrograde tracer CTB was injected into the  
107 ACC, followed by immunofluorescence staining of the DR sections with TPH2, a marker  
108 of 5-HTergic neurons. A substantial number of TPH2+ neurons colocalized with CTB,  
109 indicating the presence of DR→ACC 5-HTergic projections (Figure 1 – figure supplement  
110 1). We then used a novel dual-virus optogenetics approach to explore the function of  
111 DR→ACC 5-HTergic circuit in consolation-like behaviors and sociability, where  
112 double-floxed AAV-DIO-ChR2-mCherry (DIO-ChR2) or AAV-DIO-eNpHR3.0-mCherry  
113 (DIO-eNpHR3.0) were injected into the DR and retro-AAVs containing TPH2 promoter  
114 and Cre element (rAAV(Retro)-TPH2-Cre) were injected into the ACC (Figure 1A). This

115 virus strategy ensures that opsins (excitatory CHR2 or inhibitory eNpHR3.0) mainly  
116 expressed within the DR→ACC 5-HTergic circuit. Immunohistochemical staining  
117 showed that more than 75% of mCherry-labeled neurons expressed TPH2 in both male  
118 and female voles, and more than 80% of TPH2+ cells coexpressed mCherry (Figure  
119 1—figure supplement 2). In the electrophysiological study, we found that the DR  
120 neurons reliably responded to pulses of 473 (activation)/593 (inhibition) nm light stimuli  
121 (Figure 1D-E). These results indicate the availability of this virus strategy.

122 To test whether modulation of DR 5-HT neuron activity alters consolation and  
123 sociability, five weeks after the virus injection, optic fibres were implanted above the DR  
124 (Figure 1A-B). In CHR2-expressing animals, activation of 5-HTergic neurons in the DR  
125 did not significantly affect allogrooming time in the consolation test (Figure 1G),  
126 sociability in the 3-chamber test (Figure 1I) and time spent in central area in the  
127 open-field test (Figure 1K) in both male and female voles. However, in the  
128 eNpHR3.0-expressing animals, optogenetic inhibition of 5-HTergic neurons in the DR  
129 significantly reduced the time spent in allogrooming towards a shocked partner (Figure  
130 1H), which may indicate an impairment in consolation (Male:  $t_{(14)} = 11.128$ ; Female:  $t_{(14)} =$   
131  $6.327$ ; all  $P < 0.01$ ). The treatment also significantly reduced the chasing time ( $t_{(14)} = 8.662$ ,  
132  $8.078$ , male ahead, all  $P < 0.01$ ; Figure 1—figure supplement 3B), but did not significantly  
133 affect the self-grooming time ( $t_{(14)} = 0.470, 1.118, P = 0.645, 0.282$ ; male ahead; Figure  
134 1—figure supplement 3D). Furthermore, in the 3-chamber test, two-way ANOVA  
135 showed that ‘light stimulation’ exerted significantly effects on sociability in both male  
136 and female voles ( $F_{(1,28)} = 12.286, 10.838$ ; all  $P < 0.01$ ; male ahead). Optogenetic inhibition  
137 of DR 5-HT neurons reduced the social preference ratio in the eNpHR3.0-expressing  
138 voles (off *vs.* on; all  $P < 0.01$ ; Figure 1J right bars), but had no effect on control voles (off  
139 *vs.* on; all  $P > 0.05$  Figure 1J left bars). In the 5-min open-field test, the treatments (‘virus’  
140 and ‘light’) did not significantly alter the time spent in central area (Figure 1L) and the  
141 total distance traveled (Figure 1—figure supplement 3F). In the following experiment, we

142 found the photoinhibitory effect disappeared within 24 h (Figure 1 – figure supplement  
 143 4).

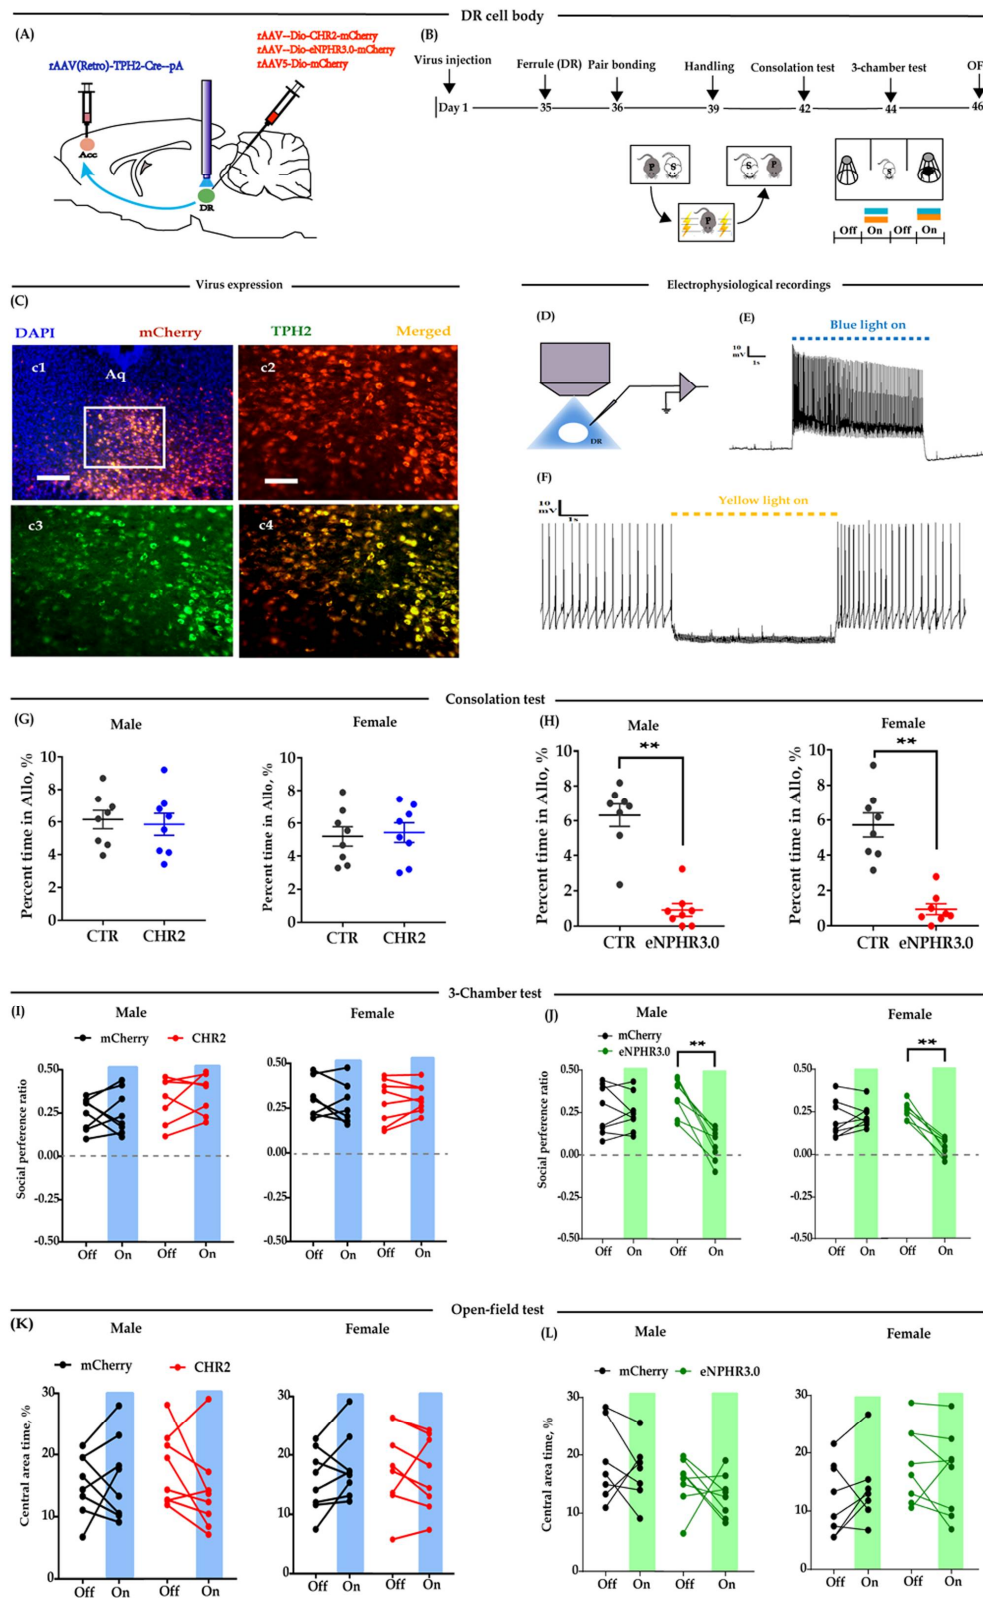

144

145 **Figure 1. Optogenetic bidirectional modulation of 5-HT neuron in the DR in the**  
146 **DR→ACC neural circuit.** (A): Schematic of optogenetic manipulation; (B): timeline of  
147 experiments; (C): immunohistological image showing virus expression in the DR (c1) and  
148 amplified images in the left box showing the mCherry, TPH2 and the colocalization of the  
149 two ('c2-c4, × 200); (D): electrophysiological recordings model; (E & F): representative  
150 traces from electrophysiological recordings showing photostimulation (E) and  
151 photoinhibition of a 5-HT neuron (F); (G-L): quantification of allogrooming time in the  
152 consolation test (G & H); social preference ratio in the three-chamber test (I & J) and time  
153 spent in the central area in the open-field test (K & L) during optogenetic modulations.  
154 Data are presented as mean ± SE,  $n = 7-8$  in each group,  $**P < 0.01$ . For G-H, two-tailed  
155 independent  $t$  tests; for I-L, two-way ANOVA with Bonferroni *pos-hoc* test. ACC: anterior  
156 cingulate cortex; CTR: control; DR: dorsal raphe nucleus; TPH2: tryptophan hydroxylase  
157 2.



158 **Optogenetic inhibition of ACC 5-HT terminals in the DR→ACC neural circuit**  
159 **similarly impaired consolation and reduced sociability**  
160 The modulation of 5-HT neurons may affect other neurons in the DR, and thus confound  
161 behavioral performance. In subsequent experiments, we placed optic fibers in the ACC  
162 and investigated whether the direct modulation of 5-HT terminals in this region would  
163 exert the same effects (Figure 2A). Similarly, optogenetic activation of DR-ACC 5-HT  
164 terminals did not significantly alter the behavioral performance in the consolation test,  
165 except that CHR2-expressing females spent more time chasing after their shocked  
166 partners (Figure 2—figure supplement 1A;  $t_{(14)} = 2.458$ ;  $P = 0.028$ ). In the 3-chamber test, a  
167 significant interaction of ‘light × virus’ was observed in females ( $F_{(1,28)} = 4.646$ ,  $P = 0.04$ ),  
168 and the *post hoc* comparison showed that optogenetic activation of 5-HT terminals in the  
169 ACC increased the social preference ratio in CHR2-expressing females but had no effect  
170 on control females (off *vs.* on,  $P = 0.012$ ; Figure 2E, right bars), but had no effect on female  
171 control (off *vs.* on,  $P = 0.725$ , Figure 2E, left bars).

172 Optogenetic inhibition of DR-ACC 5-HT terminals significantly reduced the time  
173 spent in allogrooming (Figure 2D) and chasing the shocked partners in the consolation  
174 test (male:  $t_{(14)} = 8.441, 7.201$ ; female:  $t_{(14)} = 12.174, 8.695$ ; all  $P < 0.01$ ; allogrooming time  
175 ahead; Figure 2—figure supplement 1B), but had also no effect on selfgrooming time ( $t_{(14)}$   
176 = 0.438, 0.654;  $P = 0.799, 0.506$ ; males ahead; Figure 2—figure supplement 1D). Similarly,  
177 the inhibitory effect disappeared within 24 h (Figure 2—figure supplement 2). In the  
178 3-chamber test, two-way ANOVA showed a significant effect of ‘light stimulation’ on  
179 sociability in both male and female voles ( $F_{(1,28)} = 9.8, 36.7$ ; all  $P < 0.01$ ; male ahead).  
180 Optogenetic inhibition of DR-ACC 5-HT terminals significantly reduced the social  
181 preference ratio in the eNPHR3.0-expressing animals (Figure 2F, all  $P < 0.01$ ; off *vs.* on).  
182 Similarly, behavioral performance in the open-field test was unaffected by the  
183 manipulation of 5-HT terminals in both CHR2- and eNPHR3.0-expressing animals  
184 (Figure 2G, H; Figure 2—figure supplement 1E, F).

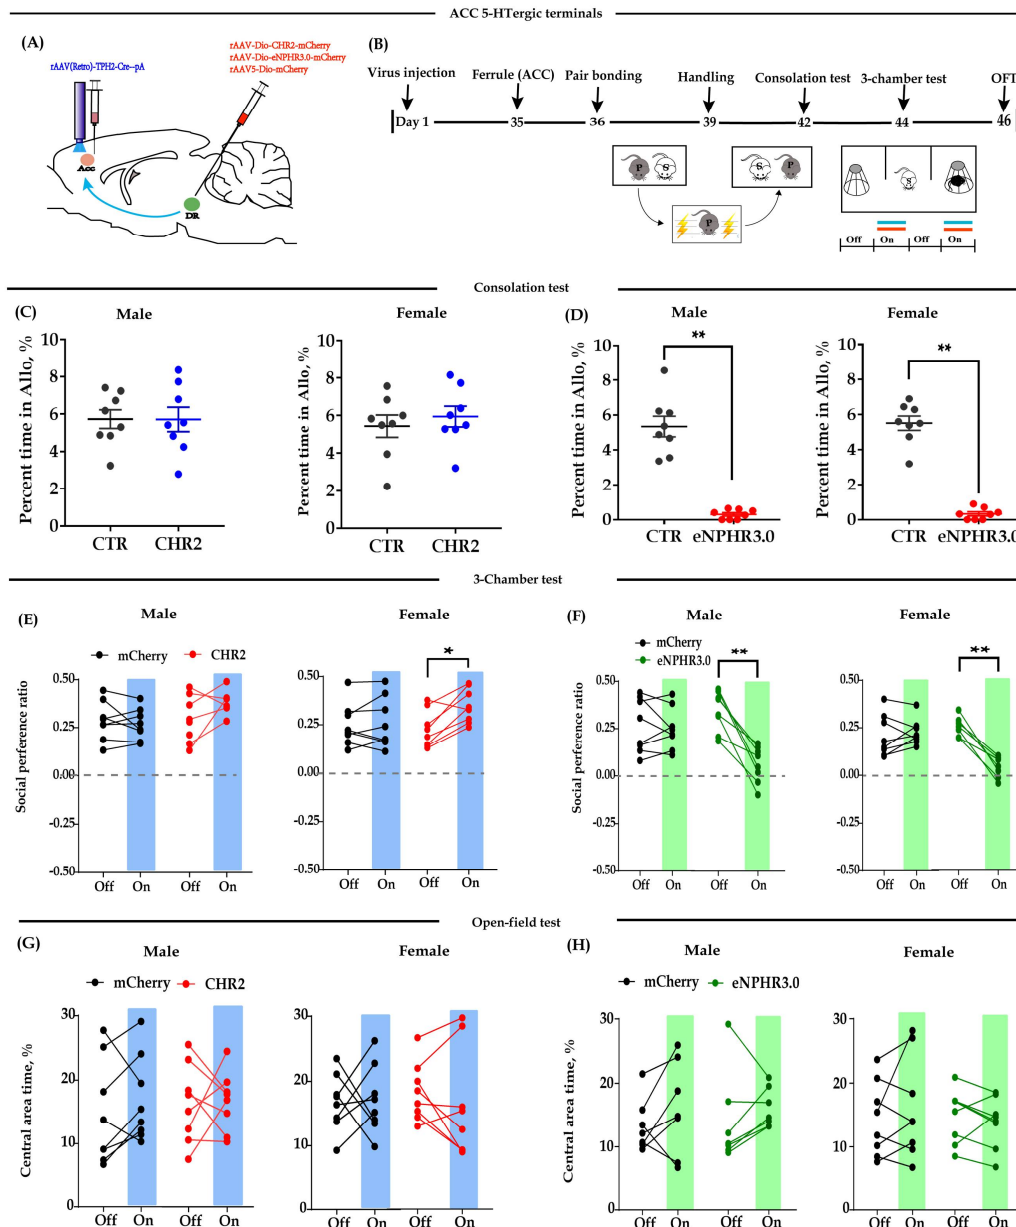

185

186 **Figure 2. Optogenetic bidirectional modulation of 5-HT terminals within the ACC**

187 **in the DR→ACC neural circuit.** (A): Schematic of optogenetic manipulation; (B):

188 timeline of experiments; (C-H): quantification of time spent in allogrooming in the

189 consolation test (C & D), sociability in the three-chamber test (E & F) and time spent in

190 the central area in the open-field test (G & H) during optogenetic modulations. Data are

191 presented as mean ± SE,  $n = 7-8$  in each group, \* $P < 0.05$ , \*\* $P < 0.01$ . For C-D, two-tailed

192 independent  $t$  tests; for E-H two-way ANOVA with Bonferroni *pos-hoc* test. ACC:

193 anterior cingulate cortex; DR: dorsal raphe nucleus; CTR: control.

194 **Chemogenetic inhibition of DR 5-HT neurons in the DR→ACC neural circuit**

195 **impaired consolation and reduced sociability**

196 To confirm above optogenetic results over a longer time frame, we used a chemogenetic  
197 approach to selectively express 'Gq-DREADD' or 'Gi-DREADD' in the DR 5-HT neurons  
198 by injecting AAV-DIO-hM4Dq-mCherry (Gq-DREADD) or AAV-DIO-hM4Di-mCherry  
199 (Gi-DREADD) into the DR and rAAV(Retro)-TPH2-Cre into the ACC (Figure 3A).

200 Immunohistochemical staining revealed that more than 65% TPH2 labeled neurons were  
201 infected by mCherry virus and more than 60% TPH2+ cells co-expressed mCherry  
202 (Figure 3 – figure supplement 1). To determine whether the ligand CNO can activate or  
203 inhibit DR 5-HT neurons, whole-cell current-clamp recordings were performed. The  
204 results showed that addition of 10  $\mu$ M CNO remarkably increased the number of action  
205 potentials in the Gq-DREADD-transfected neurons (Figure 3D). In contrast, CNO caused  
206 a significantly decrease in the number of spikes (Figure 3E) and increased the spike  
207 rheobase during current step injections in Gi-DREADD-transfected neurons (Figure 3F).  
208 These results indicate the specificity and applicability of this virus strategy.

209 In subsequent behavioral studies, we found chemogenetic inhibition of DR 5-HT  
210 neurons significantly reduced the allogrooming time of both sexes ( $t_{(6)} = 5.0$ ,  $t_{(7)} = 4.2$ , all  
211  $P < 0.01$  vs. vehicle control, male ahead; Figure 3G), but did not affect the chasing and  
212 self-grooming times (Figure 3 – figure supplement 2A&B) in the consolation test.  
213 Similarly, CNO-treated Gi-DREADD-expressing voles showed reduced sociability in the  
214 3-chamber test ( $t_{(6)} = 2.8$ ,  $P < 0.05$ ;  $t_{(7)} = 6.1$ ,  $P < 0.01$ ; male ahead; Figure 3H). The CNO  
215 treatment did not exert significant effects on behavioral performance and distance  
216 traveled in the open-field test (Figure 3I; Figure 3 – figure supplement 2C).

217 Based on the results of the chemogenetic and optogenetic experiments described  
218 above, inhibition of DR→ACC 5-HTergic circuit activity is sufficient to impair  
219 consolation and social abilities.

220

221

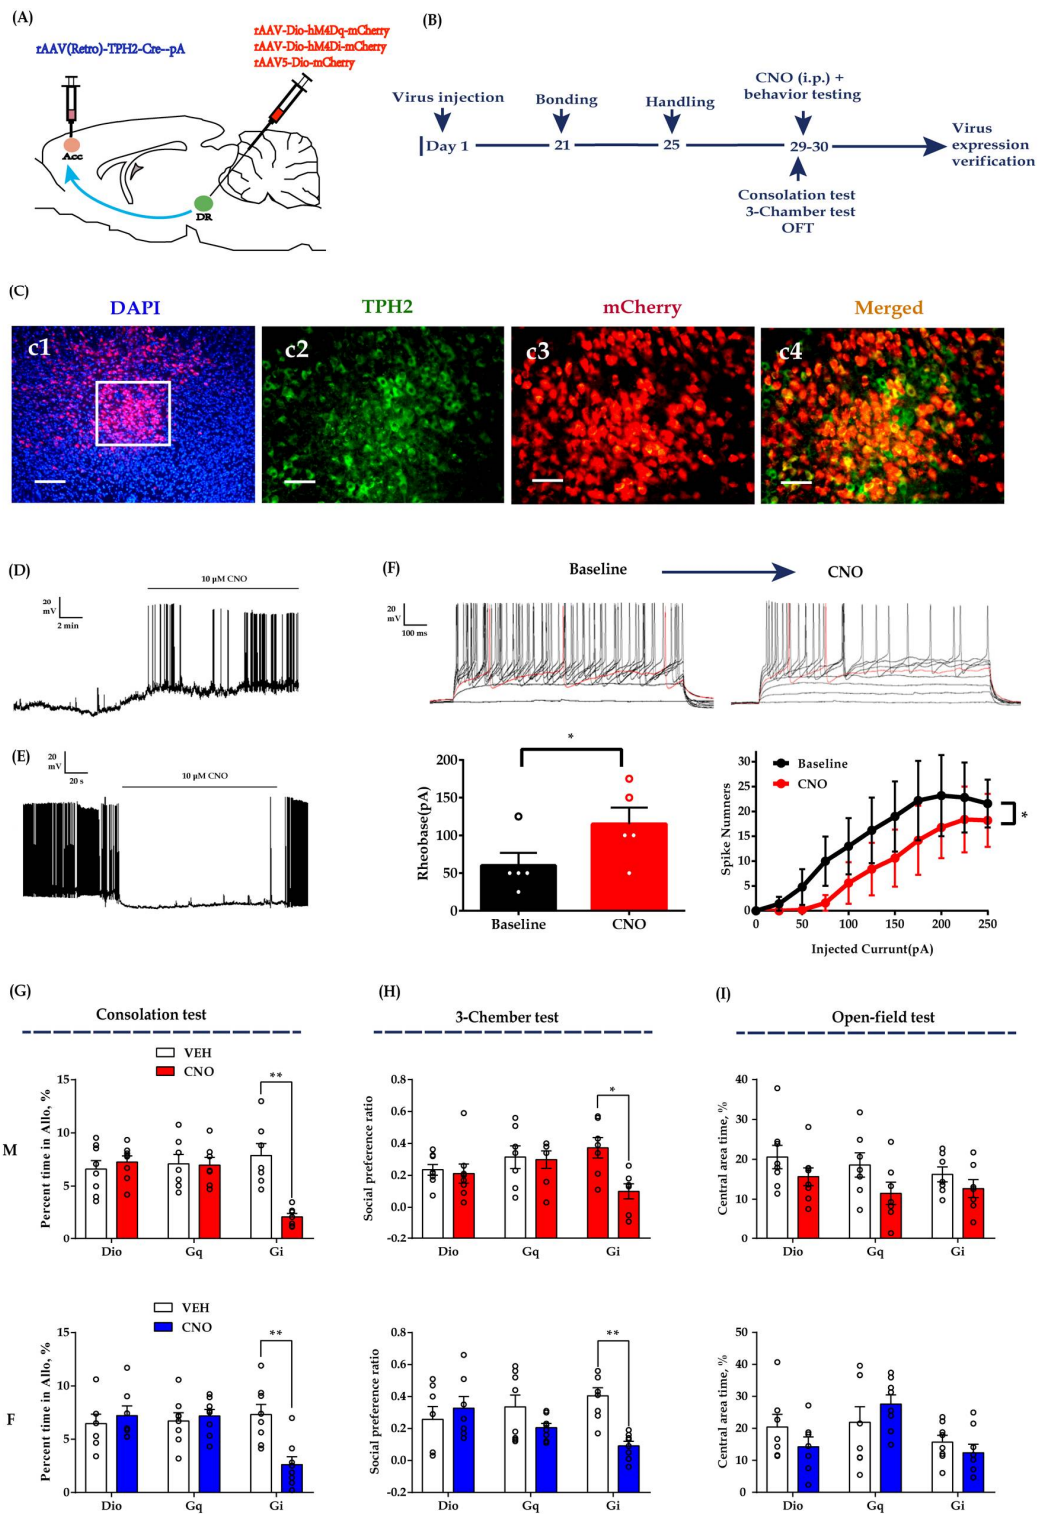

222

223

224

225

226 **Figure 3. Chemogenetic modulation of DR 5-HT neuron activities in the DR→ACC**  
227 **neural circuit.** (A): Schematic of chemogenetical manipulations; (B): timeline of  
228 experiments; (C): immunohistological image showing virus expression in the DR (c1) and  
229 amplified images in the left white box showing the mCherry, TPH2 and the colocalization  
230 of the two (c2-c4, × 200); (D): representative trace from a Gq-DREADD neuron; (E):  
231 representative trace from a Gi-DREADD-transfected neuron; (F): quantification of spike  
232 rheobase and spike numbers under current step injections in Gi-DREADD-transfected  
233 neurons ( $n = 5$  neurons,  $*P < 0.05$ ); (G-I): quantification of allogrooming time in the  
234 consolation test (G); social preference ratio in the three-chamber test (H) and time spent  
235 in the central area in the open-field test (I) in male (upper panels) and female (down  
236 panels) voles. Data are presented as mean  $\pm$  SE,  $n = 7-8$  in each group,  $*P < 0.05$ ,  $**P <$   
237  $0.01$  compared with vehicle control. For F, two-tailed independent  $t$  tests; for G-I, paired  $t$   
238 test. ACC: anterior cingulate cortex; DR: dorsal raphe nucleus; TPH2: tryptophan  
239 hydroxylase 2; M: male; F: female.  
240

241 **Allogrooming and social approach were associated with increased DR neuron activity**  
242 **and ACC 5-HT release**

243 To further establish the potential relevance of DR→ACC 5-HTergic circuit in consolation  
244 like behaviors, we then injected AAV-GCaMP6 into the DR and AAV-5HT2.1 into the  
245 ACC at the same time. Ten days latter, fibers were implanted above the injection sites.  
246 We then used multi-channel fiber photometry to simultaneously record DR fluorescent  
247 calcium transients and ACC 5-HT release in the consolation behavior test (Figure 4A).  
248 Immunohistochemical staining revealed that more than 60% GFP neurons co-expressed  
249 TPH2 in the DR (Figure 4—figure supplement 1) and the traces of 5-HT and calcium  
250 signals correlated well during the record (Figure 4D), suggesting that this strategy was  
251 feasible and effective.

252 During the behavioral test, we found the release of 5-HT and the activity of DR  
253 neurons were significantly increased when allogrooming (5-HT release:  $t_{(4)} = -4.9, -4.7, P$   
254  $< 0.01$ ; DR activities:  $t_{(4)} = -4.7, P < 0.01, t_{(4)} = -4.2, P < 0.05$ ; males ahead; Figure 4E) and  
255 social approaching occurred (5-HT release:  $t_{(4)} = -3.1, -3.3, P < 0.05$ ; DR activities:  $t_{(4)} =$   
256  $-3.0, P < 0.05, t_{(4)} = -4.6, P < 0.01$ ; Figure 4G). An increase in fluorescence during sniffing  
257 was only observed in females (5-HT release:  $t_{(4)} = -3.8, P < 0.05$ , Figure 4F2; DR calcium  
258 activities:  $t_{(4)} = -3.7, P < 0.05$ , Figure 4F4). We did not observe significant changes in  
259 fluorescence in both the ACC and DR during self-grooming (Figure 4H) and running  
260 (Figure 4I), suggesting that the increases in fluorescence were not due to movement  
261 artifacts.

262 In the following analysis, we observed significant larger fluorescence peaks for ACC  
263 5-HT release and DR activities during allogrooming than during the other behaviors  
264 (5-HT release:  $F_{(4,20)} = 15.3, 11.7, \text{all } P < 0.01$ ; DR activities:  $F_{(4,20)} = 44.4, 32.0, \text{all } P < 0.01$ ;  
265 males ahead; *Pos hoc* comparisons: all  $P < 0.01$  for allogrooming *vs.* other behaviors;  
266 Figure 4—figure supplement 2). These results provide direct evidence that DR 5-HT

267 systems are involved in consolation-like behaviors and some social behaviors in

268 mandarin voles.

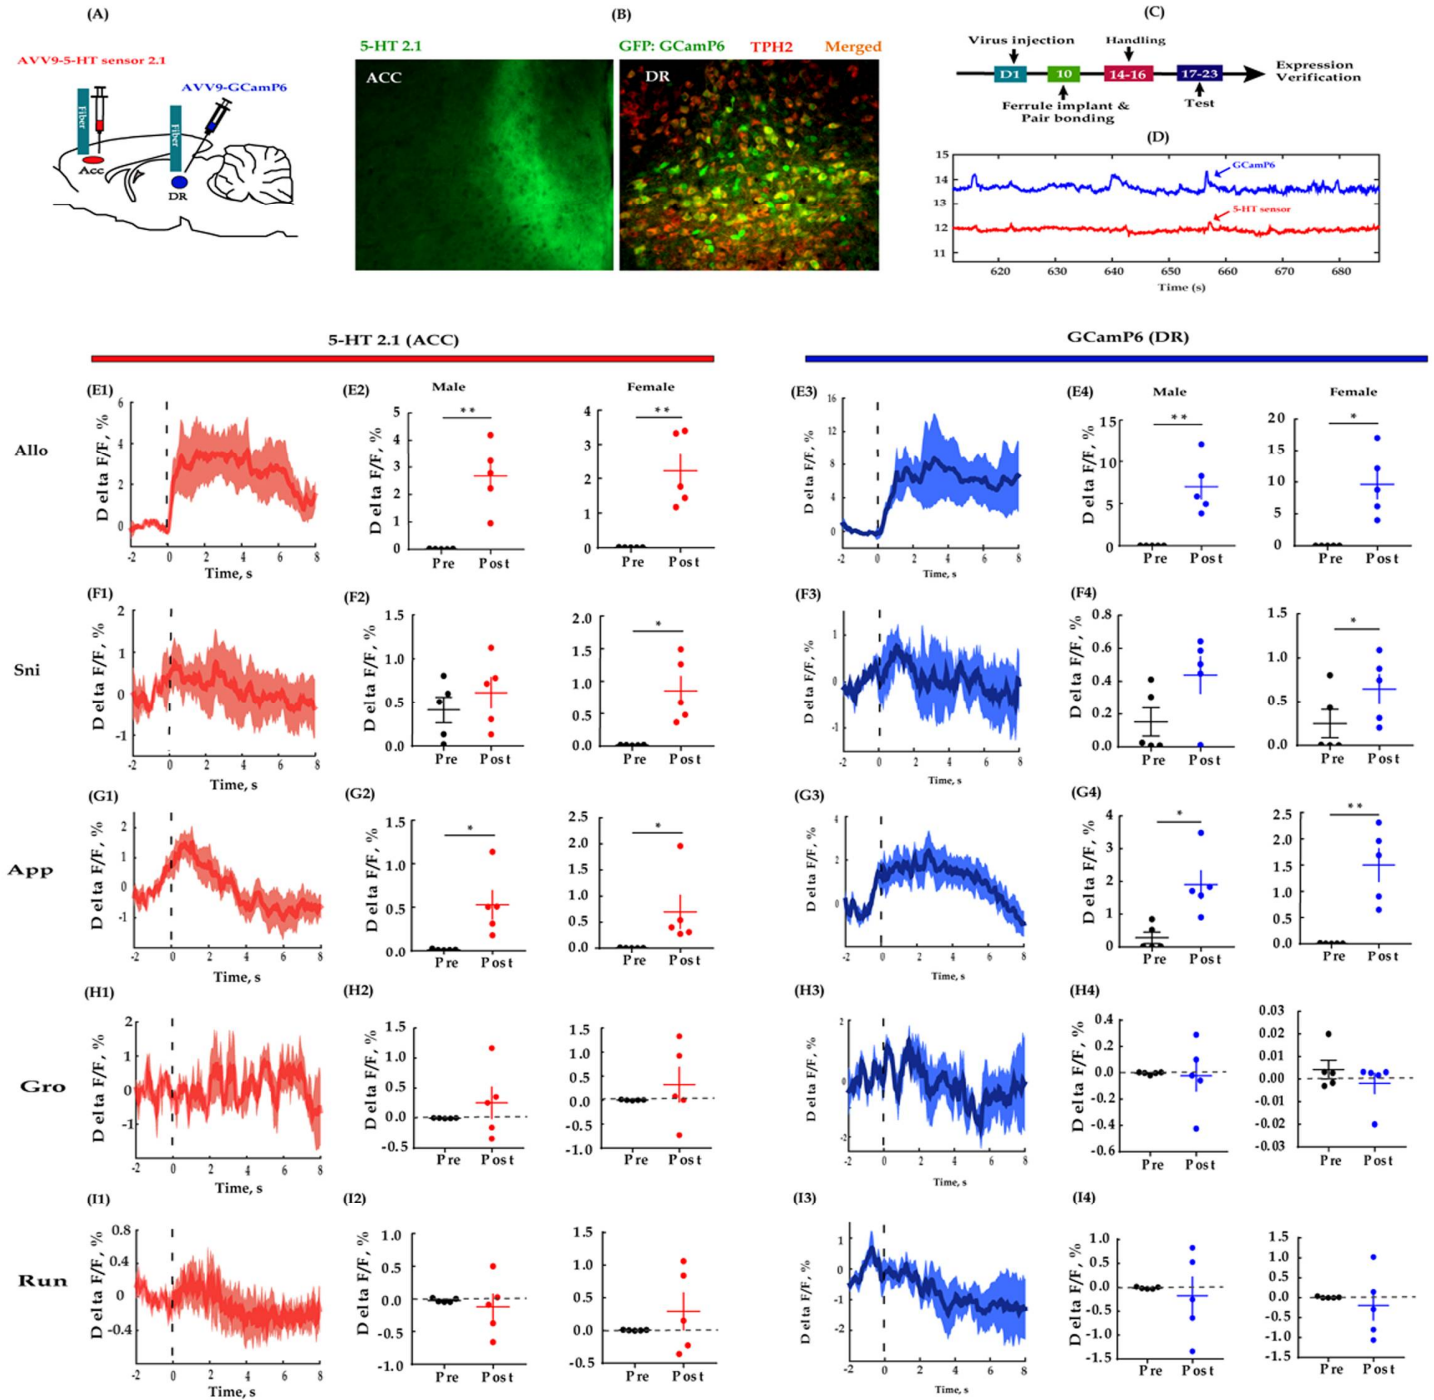

269 **Figure 4. Multichannel fiber photometry simultaneously recording of 5-HT release in**  
270 **the ACC and DR neuron activities during the consolation test.** (A): Schematic diagrams  
271 depicting the virus injection and recording sites; (B): histology showing the expression of  
272 5-HT sensor in the ACC (left) and co-localization of GCaMP6<sup>+</sup> neurons (green) with  
273 TPH2<sup>+</sup> neurons (red) in the DR (right, scale bar = 200  $\mu$ m); (C): experimental timeline for  
274 photometry experiments; (D): representative fluorescence changes of GCaMP6 (blue line)  
275 and 5-HT sensor (red line) during photometry recordings; (E1-I1): representative  
276 peri-event plot of 5-HT fluorescence signals aligned to onsets of various behavior (for all  
277 peri-event plots, the red line denotes the mean signals of 4-6 bouts of behaviors, whereas  
278 the red shaded region denotes the SE); (E2-I2): quantification of change in 5-HT  
279 fluorescence signals in the ACC before and after the events ( $n = 5$ ); (E3-I3): representative  
280 peri-event plot of calcium signals aligned to onsets of various behavioral events (for all  
281 peri-event plots, the blue line denotes the mean signals of 4-6 bouts of behaviors,  
282 whereas the blue shaded region denotes the SE); (E2-I2): quantification of change in  
283 calcium signals (GCaMP6 fluorescence) in the DR before and after the events. Data are  
284 presented as mean  $\pm$  SE,  $n = 5$  in each group, \* $P < 0.05$ , \*\* $P < 0.01$ ; paired  $t$  test for E-I.  
285 ACC: anterior cingulate cortex; DR: dorsal raphe nucleus; TPH2: tryptophan hydroxylase  
286 2; Allo: allogrooming; Sni: sniffing; App: approaching; Gro: selfgrooming; Run: running.



287 **Serotonin in the ACC mediated consolation-like behaviors through 5-HT1A receptors**

288 The most abundant 5-HT receptors expressed in the mPFC are 5-HT1AR and 5-HT2AR  
289 (Carhart-Harris & Nutt, 2017). 5-HT1A receptors are generally considered inhibitory,  
290 whereas 5-HT2A receptors are excitatory (Puig & Gullledge, 2011). To examine which  
291 kind of receptor mediated consolation-like behaviors within the ACC, we therefore  
292 infused a 5-HT1AR receptor agonist (8-OH-DPAT) or a 5-HT2AR antagonist (MDL  
293 100907) into the ACC along with chemogenetic inhibition of DR 5-HT neurons before  
294 conducting behavioral assays (Figure 5A & B). The behavioral analysis indicated a  
295 significant 'drug treatment' effect on allogrooming and sociability (allogrooming:  $F_{(3,19)} =$   
296  $5.3, P = 0.01, F_{(3,23)} = 4.2, P < 0.05$ ; social preference ratio:  $F_{(3,19)} = 9.0, F_{(3,19)} = 6.4, all P <$   
297  $0.01$ ; males ahead). Not surprisingly, CNO elicited deficits in allogrooming and  
298 sociability (Figure 5C-G, left two bars). Pretreatment with 8-OH-DPAT reversed the  
299 dysfunctions to the normal level (all  $P > 0.05$  for '8-OH-DPAT+CNO' vs. 'vehicle+saline'  
300 *pos hoc* comparisons; Figure 5C-D), whereas MDL 100907 did not exert a similar effect (all  
301  $P < 0.01$ , for '8-OH-DPAT+CNO' vs. 'vehicle+saline' *pos hoc* comparisons except social  
302 preference ratio in female voles but also show such trend ( $0.25 \pm 0.14$  vs.  $0.11 \pm 0.09, P =$   
303  $0.098$ ; Figure 5F, G). The microinjected drugs and viruses did not alter the time spent in  
304 the central area and mobility in the open-field test (Figure 5E-H, Figure 5—figure  
305 supplement 2).

306

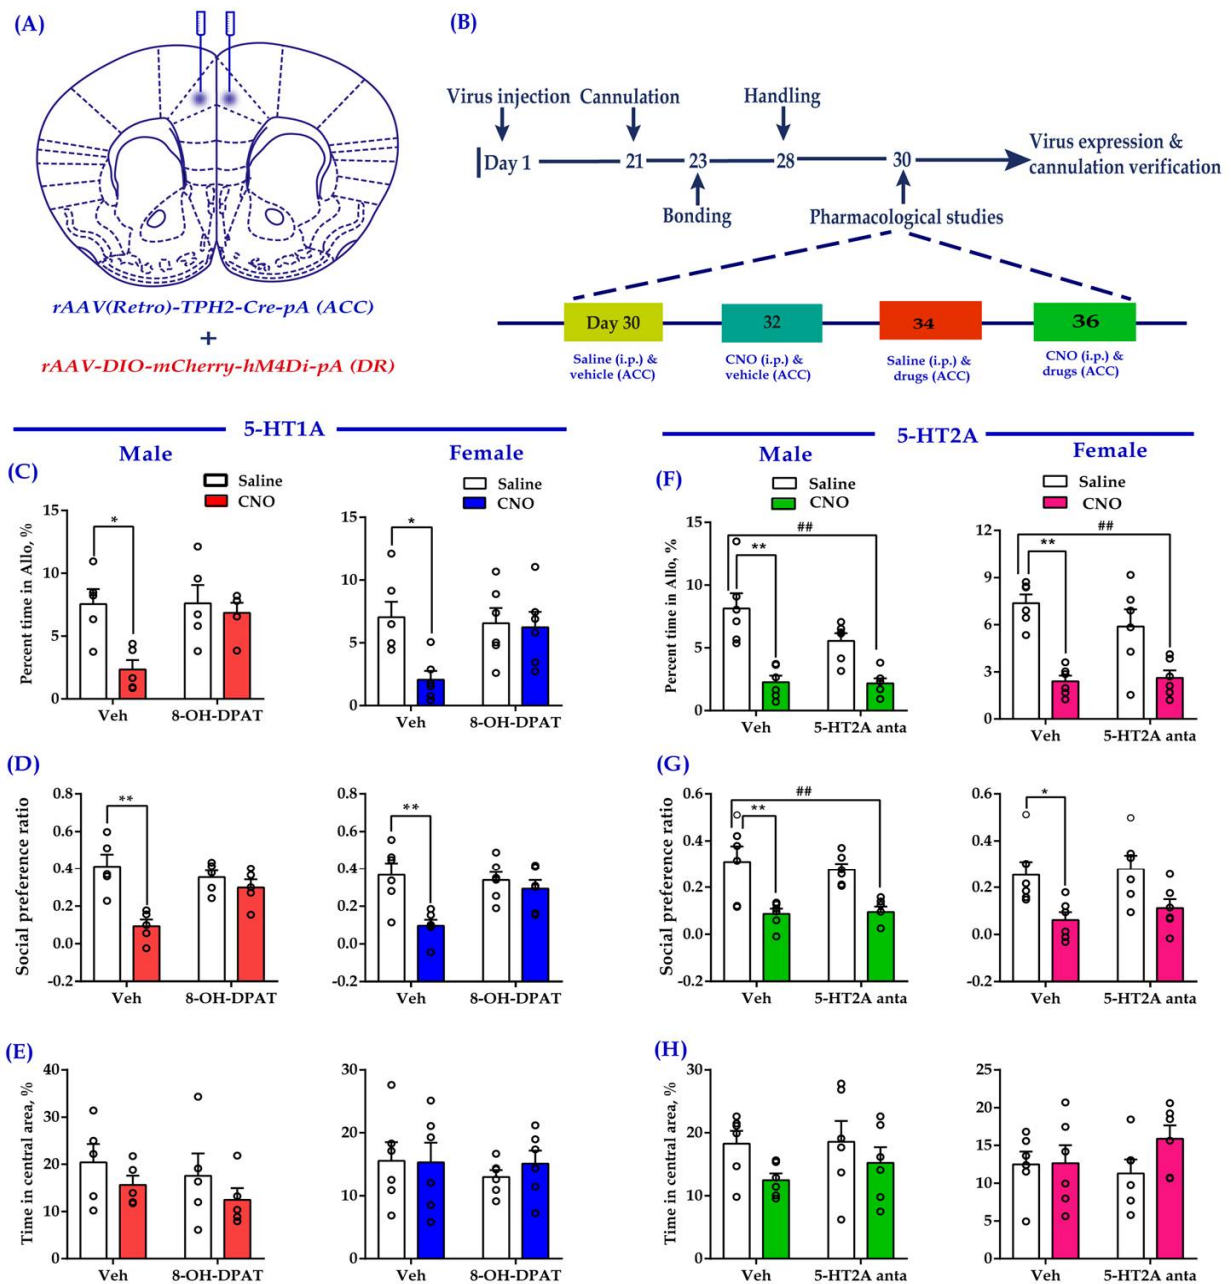

307 **Figure 5. Intra-ACC injection of a 5-HT1AR agonist rescued sociability deficits**  
308 **induced by chemogenetic inhibition of DR 5-HT neurons in the DR→ACC neural**  
309 **circuit.** (A): Schematic representation of ACC infusion sites and virus strategy; (B):  
310 timeline of experimental design; (C-E): effect of a 5-HT1AR agonist 8-OH-DPAT on  
311 allogrooming time in the consolation test (C), social preference ratio in the three-chamber  
312 test (D), and time spent in the central area in the open-field test (E) in male (left panels)  
313 and female (right panels) voles; (F-H): effect of a 5-HT2AR antagonist (MDL 100907) on  
314 allogrooming time in the consolation test (F), social preference ratio in the three-chamber  
315 test (G) and time spent in the central area in the open-field test (H) in male (left panels)  
316 and female (right panels) voles. Data are presented as mean ± SE,  $n = 5-6$  in each group;  
317 for C-H one-way ANOVA with Bonferroni *pos-hoc* test.  $*P < 0.05$ ,  $**P < 0.01$  compared  
318 with 'vehicle + saline' *vs.* 'vehicle + CNO';  $###P < 0.01$ , '5-HT2AR antagonist + CNO' *vs.*  
319 'vehicle + saline'. Anta: antagonist; ACC: anterior cingulate cortex; DR: dorsal raphe  
320 nucleus.

321 **DISCUSSION**

322 In the present study, we demonstrated a crucial role for the DR→ACC 5-HTergic neural  
323 circuit in the regulation of consolation-like behaviors and sociability in mandarin voles  
324 for the first time. Our major findings are listed below. First, inhibition of DR 5-HT  
325 neurons or their terminals in the ACC decreased allogrooming behavior and reduced  
326 sociability. Second, DR neuron activity and ACC 5-HT release increased during  
327 allogrooming and social approaching. Third, direct activation of ACC 5-HT<sub>1A</sub> receptors  
328 was sufficient to ameliorate deficits in consolation and sociability induced by the  
329 chemogenetic inhibition of DR 5-HT neurons.

330 We found that optogenetic activation DR 5-HT neurons (Figure 1) or ACC 5-HT  
331 terminals (Figure 2) did not elicit corresponding increases in allogrooming and  
332 sociability. Chemogenetic activation of DR 5-HT neurons produced similar results  
333 (Figure 3). One possible explanation is that various 5-HT receptors expressed in the ACC  
334 and some have opposite functional effects (Puig & Gullledge, 2011; Tian, Yamanaka,  
335 Bernabucci, Zhao, & Zhuo, 2017). For example, 5-HT<sub>1A</sub>R coupled to the Gi family of G  
336 proteins induces the hyperpolarization of pyramidal neurons, whereas 5-HT<sub>2A</sub>R coupled  
337 to Gq proteins induces depolarization in the same neurons (Carhart-Harris & Nutt, 2017).  
338 In addition, these two types of receptors are expressed in both pyramidal and  
339 GABAergic neurons of the mPFC (Santana, Bortolozzi, Serrats, Mengod, & Artigas, 2004).  
340 Therefore, the net behavioral effects of 5-HT release must result from the comprehensive  
341 effects of all these receptors. However, in a previous study by Kim, et al., the directly  
342 administration of 5-HT into the ACC impaired observational fear learning, which is an  
343 empathy-like behavior (Kim et al., 2014). This inconsistency will require further  
344 investigations, and species differences (mice *vs.* voles), methodological differences  
345 (pharmacology *vs.* optogenetics and chemogenetics) or the use of different behavioral  
346 indicators (consolation *vs.* emotional contagion) may be the main explanations for the

347 discrepancy. Furthermore, optogenetic or chemogenetic activation of DR 5-HT neurons is  
348 also distinct from pharmacological intervention with MDMA, which robustly induces  
349 5-HT releases in the whole brain and enhances closeness and empathy in its users in  
350 human studies (Carlyle et al., 2019; Heifets & Malenka, 2016). Nevertheless, at least some  
351 effects of activation were visible. For example, optogenetic activation of ACC 5-HT  
352 terminals increased sociability in CHR2-expressing females. Clearly, effects of activation  
353 of the DR→ACC 5-HTergic neural circuit on sociability and empathy-like behaviors still  
354 require further in-depth study.

355         In contrast to activation manipulations, we found inhibition of the DR→ACC  
356 5-HTergic neural circuit significantly decreased intimate behaviors (allogrooming and  
357 chasing) toward their distressed partners and reduced sociability (Figures 1-3).  
358 Consistent with our results, Walsh et al found that optogenetic inhibition of DR 5-HT  
359 neurons reduced social interactions in the three-chamber test (Walsh et al., 2018).  
360 However, we still do not know whether the reduced consolation is due to the overall  
361 decrease in sociability induced by the current paradigm. Another open question is how  
362 this process occurs, namely, what are the neural mechanisms underlying this process?  
363 The neocortical excitatory/inhibitory (E/I) balance hypothesis may help address this  
364 question. The hypothesis indicated that an increase in the cortical cellular E/I balance, for  
365 example through increased activity in excitatory neurons or reduction in inhibitory  
366 neuron function, is the common etiology and final pathway for some psychiatric diseases,  
367 such as autism and schizophrenia (Bozzi, Provenzano, & Casarosa, 2018; Vattikuti &  
368 Chow, 2010). This hypothesis has recently been verified in mice, as optogenetic excitation  
369 of glutamatergic neurons in the mPFC elicited a profound impairment in sociability,  
370 while compensatory excitation of inhibitory neurons in this region partially rescued  
371 social deficits caused by an increase in the E/I balance (Yizhar et al., 2011). 5-HT tends to  
372 inhibit prefrontal pyramidal activity (Puig & Gullledge, 2011; Tian et al., 2017). For  
373 example, according to Puig et al., electrical stimulation of the DR inhibits approximately

374 two-thirds of pyramidal neurons in the mPFC (Puig, Artigas, & Celada, 2005). Therefore,  
375 a reasonable hypothesis is that inhibition of the DR→ACC 5-HTergic neural circuit may  
376 increase the E/I balance, which ultimately leads to abnormal social behaviors in  
377 mandarin voles. Clearly, this hypothesis should be verified in electrophysiological  
378 studies in the future.

379 Our results show that neither activation nor inhibition DR→ACC 5-HTergic neural  
380 circuit exerted any significant effect on some control behaviors (Figure 1—figure  
381 supplement 3; Figure 2—figure supplement 1; Figure 3—figure supplement 2), i.e.,  
382 self-grooming in the consolation test or behavioral performance in the open-field test,  
383 consistent with previous studies (for self-grooming please refer to (Correia et al., 2017);  
384 for open-field test please refer to (Walsh et al., 2018)). However, inconsistent results have  
385 also been reported. For example, Ohmura, et al found that optogenetic activation of 5-HT  
386 neurons in the median raphe nucleus enhanced anxiety-like behaviors in mice (Ohmura,  
387 Tanaka, Tsunematsu, Yamanaka, & Yoshioka, 2014); in the study by Correia, et al, the  
388 activation of 5-HTergic neurons in the DR affected behavior in the open-field test, but not  
389 anxiety (Correia et al., 2017). Different stimulation protocols or manipulations of different  
390 groups of 5-HT neurons may account for the discrepancies.

391 Our results obtained using *in vivo* multichannel fiber photometry indicated that an  
392 increase in DR neuron activity during allogrooming and social approach (Figure 4—E4  
393 and G4). This result is consistent with previous studies showing that increases in the  
394 activity of 5-HTergic neurons in the DR during nonaggressive social interactions (Y. Li et  
395 al., 2016; Walsh et al., 2018). Furthermore, using the highly sensitive 5-HT fluorescent  
396 sensors developed by Wan et al (Chaki, 2017), we provided the first evidence that  
397 allogrooming and social approach elicited robust 5-HT release in the ACC (Figure 4—E1  
398 and G1). Notably, 5-HT and calcium signals correlated well with each other during the  
399 recording period (Figure 4D), providing additional evidence that the DR→ACC  
400 5-HTergic neural circuit is implicated in consolation-like behaviors and sociability.

401 However, self-grooming and chasing did not induce 5-HT release within the ACC  
402 (Figure 4–H2, I2). This finding may indicate the behavioral relevance of the 5-HT sensors  
403 used in our study to some extent. Clearly, additional evidence is needed to confirm the  
404 effectiveness of 5-HT sensors in future studies.

405 Although both 5-HT1AR and 5-HT2AR are expressed at high levels in the mPFC and  
406 work together to modulate cortical network activity (Celada et al., 2013), we found only  
407 the 5-HT1AR receptor agonist reversed the consolation and sociability deficits induced  
408 by chemogenetic inhibition of 5-HTergic neurons in the DR (Figure 5). This result is  
409 consistent with our previous finding that the administration of WAY-100635 (a 5-HT1AR  
410 antagonist) into the ACC attenuated consolation and sociability in mandarin voles (L. F.  
411 Li, Yuan, He, Ma, et al., 2019). The 5-HT1AR within the mPFC has frequently been  
412 reported to exert antidepressant and anxiolytic effects (Artigas, 2013; Fukumoto et al.,  
413 2020; Fukumoto, Iijima, & Chaki, 2014; Wang et al., 2019), but our findings clearly  
414 indicate that this type of 5-HT receptor within the ACC is also involved in regulating  
415 some social behaviors. Clearly, this effect should be verified in many other species in  
416 future studies. The administration of the 5-HT2AR antagonist into the ACC did not exert  
417 an obvious effect on the social deficits induced by the chemogenetic inhibition of DR  
418 5-HT neurons (Figure 5F-H). Thus, 5-HT2AR within the ACC may not play a major role  
419 in consolation and sociability. However, this conclusion should be interpreted very  
420 cautiously because 5-HT2AR expression within the mPFC shows clearly rostral-to-caudal  
421 gradients in mice (Weber & Andrade, 2010) and we were unable to determine its  
422 functional role in this dimension in the present study. Furthermore, the effects of 5-HT in  
423 the ACC on consolation and sociability probably involve other subtypes of 5-HT  
424 receptors, such as 5-HT1BR and 5-HT3R, which require further examination.

425 In conclusion, our findings establish the importance of the DR→ACC 5-HTergic  
426 neural circuit in consolation-like behaviors and sociability in mandarin voles.  
427 Considering the widespread innervation of 5-HT terminals and abundant distribution of

428 5-HT receptors in the whole brain, detailed knowledge of cellular and circuit  
429 mechanisms of the 5-HTergic system, will not only improve our understanding of its  
430 complicated features and functions but also have implications for the development of  
431 novel therapies for the treatment of prevalent neuropsychiatric disorders, such as  
432 depression, autism, and schizophrenia. Additionally, although both male and female  
433 subjects were included in this study, sexually dimorphic effects were rarely observed.  
434 This finding may provide additional evidence of cooperative evolution to adapt to  
435 environmental challenges, particularly in species that adapt monogamous relationships  
436 and require cooperative breeding.

## 437 METHODS AND MATERIALS

### 438 Key Resources Table

| Reagent type                                                    | Source               | Identifier  | Additional information                                                     |
|-----------------------------------------------------------------|----------------------|-------------|----------------------------------------------------------------------------|
| <b>Antibodies</b>                                               |                      |             |                                                                            |
| Anti-TPH2 goat polyclonal antibody                              | Abcam                | ab121013    | 1/500                                                                      |
| Donkey anti-goat secondary antibody conjugated with Dylight 488 | Jackson              | 705-545-147 | 1/300                                                                      |
| Donkey anti-goat secondary antibody conjugated with TRITC       | Jackson              | 705-025-003 | 1/300                                                                      |
| DAPI                                                            | Boster               | AR1177      | Original fluid                                                             |
| <b>Drugs and compounds</b>                                      |                      |             |                                                                            |
| 8-OH-DPAT                                                       | Sigma                | H8520       | Injection site : ACC;<br>volume: 200 nL/ side;<br>concentration: 1.5 mg/mL |
| MDL 100907                                                      | Tocris<br>Bioscience | Cat#4173    | Injection site : ACC;<br>volume: 200 nL/ side;<br>concentration: 1 mg/mL   |



|                                                     |                  |                    |                                                                               |
|-----------------------------------------------------|------------------|--------------------|-------------------------------------------------------------------------------|
| CNO                                                 | BrainVTA         | Cat#<br>CNO-02     | 1 mg/kg, i.p.                                                                 |
| Cholera Toxin Subunit B<br>(CTB)594                 | Thermo<br>Fisher | Cat#C34777         | Injection site : ACC ;<br>volume : 400 nL/side ;<br>expression time : 10 days |
| <b>Optogenetic virus</b>                            |                  |                    |                                                                               |
| rAAV(Retro)-TPH2-Cre-W<br>PRE-pA                    | BrainVTA         | R-396-K1811<br>27  | Injection site : ACC ;<br>volume : 300 nL/side ;<br>expression time : 5 wks   |
| rAAV-Ef1 $\alpha$ -DIO-ChR2-mC<br>herry-WPRE-pA     | BrainVTA         | 9-2-K190827        | Injection site : DR;<br>volume : 500 nL ;<br>expression time : 5 wks          |
| rAAV-Ef1 $\alpha$ -DIO-eNpHR3.0<br>-mCherry-WPRE-pA | BrainVTA         | rAAV9-7-5-1        | Injection site : DR;<br>volume : 500 nL ;<br>expression time : 5 wks          |
| rAAV-Ef1 $\alpha$ -DIO-mCherry-<br>WPRE-pA          | BrainVTA         | 9-13-K19043<br>0   | Injection site : DR;<br>volume : 500 nL ;<br>expression time : 5 wks          |
| <b>Chemogenetic virus</b>                           |                  |                    |                                                                               |
| rAAV(Retro)-TPH2-Cre-W<br>PRE-pA                    | BrainVTA         | R-396-K1811<br>27  | Injection site : ACC ;<br>volume : 300 nL/side ;<br>expression time : 5 wks   |
| rAAV-Ef1 $\alpha$ -DIO-hM4Di(Gi<br>)mCherry-WPRE-pA | BrainVTA         | 9-43-K19052<br>1   | Injection site : DR;<br>volume : 500 nL ;<br>expression time : 5 wks          |
| rAAV-Ef1 $\alpha$ -DIO-hM4Dq(G<br>q)mCherry-WPRE-pA | BrainVTA         | 9-42-K19053<br>0   | Injection site : DR;<br>volume : 500 nL ;<br>expression time : 5 wks          |
| <b>Fiber photometry virus</b>                       |                  |                    |                                                                               |
| rAAV-hSyn-5HT2.1-WPRE-<br>hGHpA (5-HT sensor)       | BrainVTA         | 9-1826-K190<br>620 | Injection site : ACC ;<br>volume : 400 nL ;<br>expression time : 3 wks        |
| rAAV-hSyn-GCamp6m-W<br>PRE-PA                       | BrainVTA         | rAAV9-148-<br>1-1  | Injection site : DR;<br>volume : 500 nL ;<br>expression time : 5 wks          |

439 **Animals**

440 The mandarin voles used in this study were laboratory bred strains (F2-F3) whose  
441 ancestors derived from a wild population from Lingbao city (Henan, China). The voles  
442 were weaned on postnatal day 21, socially housed in same-sex in each polycarbonate  
443 cage (44×22×16 cm) and housed on a 12-h light/ dark cycle with food and water ad  
444 libitum. Voles used for experiments were about 70-90 days old at the time. All breeding,  
445 housing, and experimental procedures were in accordance with Chinese guidelines for  
446 the care and use of laboratory animals and were approved by the Animal Care and Use  
447 Committee of Shaanxi Normal University.

448 **Stereotaxic surgery and virus infusions**

449 The kind of virus, total injection volumes and the expression time were listed in Key  
450 Resources Table. For surgery, voles (about 50 days) were anesthetized with 1.5%-3.0%  
451 isoflurane and placed in a stereotaxic instrument. Next, thirty-three gauge syringe  
452 needles (Hamilton) were used for virus delivery. The injection rates were set at 50  
453 nL/min. After each injection, the needle was left in the brain for 5 min before being  
454 slowly withdrawn in order to prevent the virus from leaking out. The bregma  
455 coordinates for the virus injection were as follows: ACC: A/P: 1.6, M/L: 0.5, D/V: 1.6;  
456 DR: AP: -4.5; DV: -3.3, ML: +1.2, with a 20 angle toward the midline in the coronal plane.

457 **Microinjection and drugs**

458 The 5-HT<sub>1A</sub>R agonist 8-OH-DPAT was prepared in saline with a final concentration of  
459 1.5 mg/mL. The 5-HT<sub>2A</sub>R antagonist MDL 100907 was prepared in 0.01 M PBS (adjust  
460 PH value with 0.1 M HCl to 6.4) with a final concentration of 1 mg/mL. All the  
461 microinjections were administered 30 min before the behavioral test. The speed of  
462 injection was 0.1 μL/min, and the total injection volume were 0.2 μL per side for all the  
463 drugs. The injector tips remained in situ for another 2 min for drug diffusions. The dose

464 and timing of drug administration were chosen based on previous studies with  
465 8-OH-DPAT (Cooper, McIntyre, & Huhman, 2008; L. F. Li, Yuan, He, Ma, et al., 2019) and  
466 MDL 100907 (Ishii, Ohara, Tobler, Tsutsui, & Iijima, 2015; Pockros, Pentkowski, Swinford,  
467 & Neisewander, 2011), which adjusted according to preliminary studies. In chemogenetic  
468 studies, CNO (1 mg/kg) was dissolved in saline and delivered intraperitoneally 30 min  
469 before the behavioral test.

#### 470 **Optogenetic studies**

471 For optogenetic activation, ferrules were connected (by patch cords) to a 473 nm laser  
472 diode through a FC/PC adaptor and a fibre optic rotary joint. The output parameters  
473 were: 10 ms, 20 Hz, 8 s on and 2 s off cycle,  $\sim 10$  mW for terminal stimulation,  $\sim 5$  mW  
474 for somatic stimulation. For optogenetic inhibition, ferrules were connected to a 593 nm  
475 laser diode. The output parameters were: 10 ms, 20 Hz, constant,  $\sim 10$  mW for both  
476 terminal and somatic inhibition. The optogenetic stimulation parameters were chosen  
477 and slightly modified based on previous studies (Garcia-Garcia et al., 2018; Walsh et al.,  
478 2018; Zhao et al., 2011).

#### 479 **Behavioral assays**

480 Generally, all the behavioral experiments were performed under dim light during the  
481 dark phase of the light-dark cycle. For optogenetic and fibre photometry studies, all  
482 subjects were allowed to habituate to patch cords for at least three days and allowed 30  
483 min acclimation to the connection before the experiment started. The lasting effects of the  
484 laser were measured 24 h after the stimulation. In all tests, all groups of experimental  
485 mice were randomly selected and the observers were blinded to the treatments.

#### 486 Consolation test

487 The consolation test was performed as previously described (Burkett et al., 2016). Briefly,  
488 five days before the experiment, age-matched adult male and female voles were

489 cohoused together to promote the formation of a pair bond (Yu et al., 2012). On the  
490 testing day, the subjects' partners were gently transferred in a cup to a sound-proof  
491 electric shock chamber and then subjected to 10 rounds of light foot shocks (3 s, 0.8 mA, 2  
492 min intertrial intervals). At the same time, the test voles were left undisturbed in their  
493 home cages. After the separation, the pairs were reunited, and the behavior of the  
494 subjects was recorded using a video camera for 10 minutes in the test room. The digital  
495 videos were viewed and quantified using J Watcher software  
496 (<http://www.jwatcher.ucla.edu/>). According to previous studies (Burkett et al., 2016; Li  
497 et al., 2019), allogrooming is designated as behavioral indicators of consolation, which  
498 defined as head contact with the body or head of their partner, accompanied by a  
499 rhythmic head movement.

500 For optogenetic tests, the consolation test was designed as a between-subjects test in  
501 which both groups (mCherry or opsin) received laser stimulation.

### 502 Three-chamber test

503 The three-chamber test was used to assess the sociability of a subject (Horie et al., 2019;  
504 Walsh et al., 2018). The apparatus consisted of a rectangular box with three separate  
505 chambers (20 × 40 × 20 cm each). One side of each chamber contained a circular metal  
506 wire cage (stimulus animal cage, 11 cm high and 9 cm in diameter). One day before the  
507 test, all subjects were habituated to the arena for 5 min and age- and sex-matched voles  
508 (stimulus voles) also habituated to the wire cages for 5 min. On the testing day, the test  
509 vole was placed in the center chamber and a stimulus vole was randomly placed into one  
510 of the wire cages. After 2 min, the partitioning walls between the chambers were

511 removed and the test voles were allowed to explore freely for a 10 min session. The time  
512 spent exploring each chamber was automatically recorded using a video tracking system  
513 (Shanghai Xinruan, China). Sociability was calculated as follows: (time spent in the  
514 stimulus vole side – time spent in the empty side)/(time spent in the stimulus vole side +  
515 time spent in the empty side).

516 For optogenetic tests, voles received four epochs of light beginning with a light OFF  
517 baseline epoch (OFF-ON-OFF-ON). Each epoch lasted for 5 min and the total duration  
518 was 20 min.

#### 519 Open-field test

520 The anxiety level and locomotor function of the subjects were assessed by using the  
521 open-field test (Flanigan et al., 2020; Walsh et al., 2018). Briefly, a square open field (50  
522 cm × 50 cm × 25 cm) was virtually subdivided into 16 even square. The four central  
523 squares were designated as central area. At the beginning of the test, the test vole was  
524 placed into the center area facing away from the experimenter. Behavior was recorded  
525 for 5 min. Outcome measures were distance traveled, frequency entries and time spent in  
526 the central area.

527 For optogenetic tests, voles were tested twice in the same day in both light-off and  
528 light-on conditions with at least 2 h between sessions (within-subjects design).

#### 529 **Multi-channel fibre photometry**

530 The multi-channel fiber photometry recording set-up (ThinkerTech, Nanjing, China) was  
531 generated and used as previously described (Feng et al., 2019; Yuan et al., 2019). Briefly,  
532 the emission light was generated by a 480 LED, reflected with a dichroic mirror and

533 delivered to the brain in order to excite the GCaMP6m and 5-HT sensor. The emission  
534 light passed through another band pass filter, into a CMOS detector (Thorlabs, Inc.  
535 DCC3240M) and finally recorded by a Labview program (TDMSViewer, ThinkerTech,  
536 Nanjing, China).

537 On the test day, voles were mildly anesthetized with isoflurane and connected to a  
538 multi-mode optic fiber patch cord (ThinkerTech Nanjing Bioscience®, NA: 0.37, OD: 200  
539  $\mu\text{m}$ ) which the other end connected to fiber photometry apparatus. After 30 min  
540 habituation, the voles were subjected to consolation test and the behavioral recording  
541 consisted of allogrooming, sniffing, approaching, self-grooming and running.

542 Fiber photometry signals were processed with custom-written MATLAB software.  
543 Briefly, all the data were segmented based on the behavioral events and baseline phase.  
544 The change in fluorescence ( $\Delta F/F$ ) was calculated as  $(F-F_0)/F_0$ , where  $F_0$  represents the  
545 baseline fluorescence signal averaged over a 10 s-long control time window. We first  
546 segmented the data based on the behavioral events. Then, we calculated the average  
547 5-HT and calcium signals in both the pre- and postphases. The response elicited during a  
548 behavior was calculated as the average  $\Delta F/F$  during all trials of a particular behavior.  
549 The peak response during a behavior was calculated as the maximum  $\Delta F/F$  during the  
550 behavior minus  $F_0$ .

### 551 **In vitro electrophysiological recordings**

552 To verify the optogenetic and chemogenetic manipulations, we performed in vitro  
553 whole-cell patch-clamp recordings from DR neurons. Neurons expressing ChR2,  
554 eNpHR3.0, hM3Dq and hM4Di were visually identified by fluorescence of mCherry. The  
555 voles were anesthetized with isoflurane. Brains were quickly dissected and 300  $\mu\text{m}$   
556 coronal slices containing the DRN were prepared in a chamber filled with ACSF (32-34 °C)  
557 using vibratome (Campden 7000 smz). The recordings were obtained using a Multiclamp  
558 700B amplifier, filtered at 5 kHz and sampled at 10 kHz with Digidata 1440A. Clampex

559 10.5 was used for analysis.

560 Current-clamp recordings were performed to measure evoked action potentials. For  
561 photoactivation and photoinhibition, the light protocols used during behavioral tests  
562 were delivered through a 200  $\mu\text{m}$  optical fiber close to recorded neurons. For CNO  
563 activation, spontaneous firing of action potentials in the cell was recorded in current  
564 clamp mode at -60 mV. After 5 min of recording, the slices were perfused with 10  $\mu\text{M}$   
565 CNO. The total recording time for each cell was 10 min. For CNO inhibition, we applied  
566 currents in steps of 25 pA, ranging from 0 pA to 250 pA. Neurons were allowed to  
567 recover for 10 min then perfused with 10  $\mu\text{M}$  CNO. The same current procedure was  
568 performed. Afterwards, the CNO was removed by washes with ASCF and cells were  
569 recorded for another 10 min.

#### 570 **Data analysis**

571 All data are represented as mean  $\pm$  SEM. All data were assessed for normality using a  
572 one-sample Kolmogorov-Smirnov test, and Levene's test was used to confirm  
573 homogeneity of variance. Unless other indicated, two-tailed independent  $t$  tests or paired  
574  $t$  tests were used for single value comparisons. ANOVA was used to perform group  
575 comparisons with multiple measurements. Bonferroni corrections were conducted for  
576 multiple comparisons when appropriate. Data are considered to be statistically  
577 significant if  $P < 0.05$ .

578 **ACKNOWLEDGMENTS AND DISCLOSURES**

579 This research was supported by the National Natural Science Foundation of China  
580 (31970424, 31670421, 31372213 and 31772473), the Natural Science Basic Research Plan in  
581 Shaanxin Province of China (2018JM3032) and the Fundamental Research Funds for  
582 Central University (GK201903059). We thank Yu-Ying Yang, Xin Zhang and Yi-Xin Feng  
583 for assistance in conducting experiments and caring for voles. The authors declare no  
584 conflict of interest.

585

586 **AUTHOR CONTRIBUTIONS**

587 Prof. F.D.T. designed the study; L.F.L. conducted the majorities of experiments and wrote  
588 the original draft; L.Z.Z participated in the electrophysiological experiment; Z.X.H. and  
589 R.J. discussed the results and provided constructive comments; H.M., Y.F.X, W.Y., J.Z.,  
590 W.J.H., Z.J.L. and L.Y.T. participated in the behavior study and helped to collect and  
591 analyze the data. All authors contributed to and have approved the final manuscript.



592 **References**

- 593 Artigas, F. (2013). Serotonin receptors involved in antidepressant effects. *Pharmacol Ther*,  
594 137(1), 119-131. doi: 10.1016/j.pharmthera.2012.09.006
- 595 Bozzi, Y., Provenzano, G., & Casarosa, S. (2018). Neurobiological bases of  
596 autism-epilepsy comorbidity: a focus on excitation/inhibition imbalance. *Eur J*  
597 *Neurosci*, 47(6), 534-548. doi: 10.1111/ejn.13595
- 598 Burkett, J. P., Andari, E., Johnson, Z. V., Curry, D. C., de Waal, F. B., & Young, L. J. (2016).  
599 Oxytocin-dependent consolation behavior in rodents. *Science*, 351(6271), 375-378.  
600 doi: 10.1126/science.aac4785
- 601 Carhart-Harris, R. L., & Nutt, D. J. (2017). Serotonin and brain function: a tale of two  
602 receptors. *J Psychopharmacol*, 31(9), 1091-1120. doi: 10.1177/0269881117725915
- 603 Carlyle, M., Stevens, T., Fawaz, L., Marsh, B., Kosmider, S., & Morgan, C. J. (2019).  
604 Greater empathy in MDMA users. *J Psychopharmacol*, 33(3), 295-304. doi:  
605 10.1177/0269881119826594
- 606 Celada, P., Puig, M. V., & Artigas, F. (2013). Serotonin modulation of cortical neurons and  
607 networks. *Front Integr Neurosci*, 7, 25. doi: 10.3389/fnint.2013.00025
- 608 Charnay, Y., & Leger, L. (2010). Brain serotonergic circuitries. *Dialogues Clin Neurosci*,  
609 12(4), 471-487.
- 610 Cooper, M. A., McIntyre, K. E., & Huhman, K. L. (2008). Activation of 5-HT1A  
611 autoreceptors in the dorsal raphe nucleus reduces the behavioral consequences of  
612 social defeat. *Psychoneuroendocrinology*, 33(9), 1236-1247. doi:  
613 10.1016/j.psyneuen.2008.06.009

- 614 Correia, P. A., Lottem, E., Banerjee, D., Machado, A. S., Carey, M. R., & Mainen, Z. F.  
615 (2017). Transient inhibition and long-term facilitation of locomotion by phasic  
616 optogenetic activation of serotonin neurons. *Elife*, 6. doi: 10.7554/eLife.20975
- 617 de Waal, F. B. M., & Preston, S. D. (2017). Mammalian empathy: behavioural  
618 manifestations and neural basis. *Nat Rev Neurosci*, 18(8), 498-509. doi:  
619 10.1038/nrn.2017.72
- 620 Dolder, P. C., Grunblatt, E., Muller, F., Borgwardt, S. J., & Liechti, M. E. (2017). A Single  
621 Dose of LSD Does Not Alter Gene Expression of the Serotonin 2A Receptor Gene  
622 (HTR2A) or Early Growth Response Genes (EGR1-3) in Healthy Subjects. *Front*  
623 *Pharmacol*, 8, 423. doi: 10.3389/fphar.2017.00423
- 624 Dolen, G., Darvishzadeh, A., Huang, K. W., & Malenka, R. C. (2013). Social reward  
625 requires coordinated activity of nucleus accumbens oxytocin and serotonin.  
626 *Nature*, 501(7466), 179-184. doi: 10.1038/nature12518
- 627 Faye, C., Hen, R., Guiard, B. P., Denny, C. A., Gardier, A. M., Mendez-David, I., & David,  
628 D. J. (2020). Rapid Anxiolytic Effects of RS67333, a Serotonin Type 4 Receptor  
629 Agonist, and Diazepam, a Benzodiazepine, Are Mediated by Projections From  
630 the Prefrontal Cortex to the Dorsal Raphe Nucleus. *Biol Psychiatry*, 87(6), 514-525.  
631 doi: 10.1016/j.biopsych.2019.08.009
- 632 Feng, J., Zhang, C., Lischinsky, J. E., Jing, M., Zhou, J., Wang, H., . . . Li, Y. (2019). A  
633 Genetically Encoded Fluorescent Sensor for Rapid and Specific In Vivo Detection  
634 of Norepinephrine. *Neuron*, 102(4), 745-761 e748. doi:  
635 10.1016/j.neuron.2019.02.037

- 636 Field, T., Diego, M., & Hernandez-Reif, M. (2009). Depressed mothers' infants are less  
637 responsive to faces and voices. *Infant Behav Dev*, 32(3), 239-244. doi:  
638 10.1016/j.infbeh.2009.03.005
- 639 Flanigan, M. E., Aleyasin, H., Li, L., Burnett, C. J., Chan, K. L., LeClair, K. B., . . . Russo, S.  
640 J. (2020). Orexin signaling in GABAergic lateral habenula neurons modulates  
641 aggressive behavior in male mice. *Nat Neurosci*. doi: 10.1038/s41593-020-0617-7
- 642 Fu, W., Le Maitre, E., Fabre, V., Bernard, J. F., David Xu, Z. Q., & Hokfelt, T. (2010).  
643 Chemical neuroanatomy of the dorsal raphe nucleus and adjacent structures of  
644 the mouse brain. *J Comp Neurol*, 518(17), 3464-3494. doi: 10.1002/cne.22407
- 645 Fukumoto, K., Fogaça, M. V., Liu, R. J., Duman, C. H., Li, X. Y., Chaki, S., & Duman, R. S.  
646 (2020). Medial PFC AMPA receptor and BDNF signaling are required for the  
647 rapid and sustained antidepressant-like effects of 5-HT(1A) receptor stimulation.  
648 *Neuropsychopharmacology*, 45(10), 1725-1734. doi: 10.1038/s41386-020-0705-0
- 649 Fukumoto, K., Iijima, M., & Chaki, S. (2014). Serotonin-1A receptor stimulation mediates  
650 effects of a metabotropic glutamate 2/3 receptor antagonist,  
651 2S-2-amino-2-(1S,2S-2-carboxycycloprop-1-yl)-3-(xanth-9-yl)propanoic acid  
652 (LY341495), and an N-methyl-D-aspartate receptor antagonist, ketamine, in the  
653 novelty-suppressed feeding test. *Psychopharmacology (Berl)*, 231(11), 2291-2298. doi:  
654 10.1007/s00213-013-3378-0
- 655 Garcia-Garcia, A. L., Canetta, S., Stujenske, J. M., Burghardt, N. S., Ansorge, M. S.,  
656 Dranovsky, A., & Leonardo, E. D. (2018). Serotonin inputs to the dorsal BNST  
657 modulate anxiety in a 5-HT1A receptor-dependent manner. *Mol Psychiatry*, 23(10),

- 658 1990-1997. doi: 10.1038/mp.2017.165
- 659 Gong, P., Liu, J., Blue, P. R., Li, S., & Zhou, X. (2015). Serotonin receptor gene (HTR2A)
- 660 T102C polymorphism modulates individuals' perspective taking ability and
- 661 autistic-like traits. *Front Hum Neurosci*, 9, 575. doi: 10.3389/fnhum.2015.00575
- 662 Gyurak, Anett, Haase, Claudia M., Sze, Jocelyn, Goodkind, Madeleine S., Coppola,
- 663 Giovanni, Lane, Jessica, . . . Levenson, Robert W. (2013). The effect of the
- 664 serotonin transporter polymorphism (5-HTTLPR) on empathic and self-conscious
- 665 emotional reactivity. *Emotion*, 13(1), 25-35. doi: 10.1037/a0029616
- 666 He, Z., Young, L., Ma, X. M., Guo, Q., Wang, L., Yang, Y., . . . Tai, F. (2019). Increased
- 667 anxiety and decreased sociability induced by paternal deprivation involve the
- 668 PVN-PrL OTergeric pathway. *Elife*, 8. doi: 10.7554/eLife.44026
- 669 Heifets, B. D., & Malenka, R. C. (2016). MDMA as a Probe and Treatment for Social
- 670 Behaviors. *Cell*, 166(2), 269-272. doi: 10.1016/j.cell.2016.06.045
- 671 Horie, K., Inoue, K., Suzuki, S., Adachi, S., Yada, S., Hirayama, T., . . . Nishimori, K.
- 672 (2019). Oxytocin receptor knockout prairie voles generated by CRISPR/Cas9
- 673 editing show reduced preference for social novelty and exaggerated repetitive
- 674 behaviors. *Horm Behav*, 111, 60-69. doi: 10.1016/j.yhbeh.2018.10.011
- 675 Ishii, H., Ohara, S., Tobler, P. N., Tsutsui, K., & Iijima, T. (2015). Dopaminergic and
- 676 serotonergic modulation of anterior insular and orbitofrontal cortex function in
- 677 risky decision making. *Neurosci Res*, 92, 53-61. doi: 10.1016/j.neures.2014.11.009
- 678 Kim, B. S., Lee, J., Bang, M., Seo, B. A., Khalid, A., Jung, M. W., & Jeon, D. (2014).
- 679 Differential regulation of observational fear and neural oscillations by serotonin

- 680 and dopamine in the mouse anterior cingulate cortex. *Psychopharmacology (Berl)*,  
681 231(22), 4371-4381. doi: 10.1007/s00213-014-3581-7
- 682 Knapska, E., Mikosz, M., Werka, T., & Maren, S. (2010). Social modulation of learning in  
683 rats. *Learn Mem*, 17(1), 35-42. doi: 10.1101/lm.1670910
- 684 Li, L. F., Yuan, W., He, Z. X., Ma, H., Xun, Y. F., Meng, L. R., . . . Tai, F. D. (2019). Reduced  
685 consolation behaviors in physically stressed mandarin voles: involvement of  
686 oxytocin, dopamine D2 and serotonin 1A receptors within the anterior cingulate  
687 cortex. *Int J Neuropsychopharmacol*. doi: 10.1093/ijnp/pyz060
- 688 Li, L. F., Yuan, W., He, Z. X., Wang, L. M., Jing, X. Y., Zhang, J., . . . Tai, F. D. (2019).  
689 Involvement of oxytocin and GABA in consolation behavior elicited by socially  
690 defeated individuals in mandarin voles. *Psychoneuroendocrinology*, 103, 14-24. doi:  
691 10.1016/j.psyneuen.2018.12.238
- 692 Li, Y., Zhong, W., Wang, D., Feng, Q., Liu, Z., Zhou, J., . . . Luo, M. (2016). Serotonin  
693 neurons in the dorsal raphe nucleus encode reward signals. *Nat Commun*, 7, 10503.  
694 doi: 10.1038/ncomms10503
- 695 Luo, M., Zhou, J., & Liu, Z. (2015). Reward processing by the dorsal raphe nucleus: 5-HT  
696 and beyond. *Learn Mem*, 22(9), 452-460. doi: 10.1101/lm.037317.114
- 697 Matsunaga, M., Ishii, K., Ohtsubo, Y., Noguchi, Y., Ochi, M., & Yamasue, H. (2017).  
698 Association between salivary serotonin and the social sharing of happiness. *PLoS*  
699 *One*, 12(7), e0180391. doi: 10.1371/journal.pone.0180391
- 700 Meneses, A., & Liy-Salmeron, G. (2012). Serotonin and emotion, learning and memory.  
701 *Rev Neurosci*, 23(5-6), 543-553. doi: 10.1515/revneuro-2012-0060

- 702 Ohmura, Y., Tanaka, K. F., Tsunematsu, T., Yamanaka, A., & Yoshioka, M. (2014).  
703 Optogenetic activation of serotonergic neurons enhances anxiety-like behaviour  
704 in mice. *Int J Neuropsychopharmacol*, 17(11), 1777-1783. doi:  
705 10.1017/s1461145714000637
- 706 Perez-Manrique, A., & Gomila, A. (2018). The comparative study of empathy:  
707 sympathetic concern and empathic perspective-taking in non-human animals.  
708 *Biol Rev Camb Philos Soc*, 93(1), 248-269. doi: 10.1111/brv.12342
- 709 Pockros, L. A., Pentkowski, N. S., Swinford, S. E., & Neisewander, J. L. (2011). Blockade  
710 of 5-HT<sub>2A</sub> receptors in the medial prefrontal cortex attenuates reinstatement of  
711 cue-elicited cocaine-seeking behavior in rats. *Psychopharmacology (Berl)*, 213(2-3),  
712 307-320. doi: 10.1007/s00213-010-2071-9
- 713 Puig, M. V., Artigas, F., & Celada, P. (2005). Modulation of the activity of pyramidal  
714 neurons in rat prefrontal cortex by raphe stimulation in vivo: involvement of  
715 serotonin and GABA. *Cereb Cortex*, 15(1), 1-14. doi: 10.1093/cercor/bhh104
- 716 Puig, M. V., & Gullledge, A. T. (2011). Serotonin and prefrontal cortex function: neurons,  
717 networks, and circuits. *Mol Neurobiol*, 44(3), 449-464. doi:  
718 10.1007/s12035-011-8214-0
- 719 Santana, N., & Artigas, F. (2017). Laminar and Cellular Distribution of Monoamine  
720 Receptors in Rat Medial Prefrontal Cortex. *Front Neuroanat*, 11, 87. doi:  
721 10.3389/fnana.2017.00087
- 722 Santana, N., Bortolozzi, A., Serrats, J., Mengod, G., & Artigas, F. (2004). Expression of  
723 serotonin<sub>1A</sub> and serotonin<sub>2A</sub> receptors in pyramidal and GABAergic neurons of

- 724 the rat prefrontal cortex. *Cereb Cortex*, 14(10), 1100-1109. doi:  
725 10.1093/cercor/bhh070
- 726 Tian, Z., Yamanaka, M., Bernabucci, M., Zhao, M. G., & Zhuo, M. (2017). Characterization  
727 of serotonin-induced inhibition of excitatory synaptic transmission in the anterior  
728 cingulate cortex. *Mol Brain*, 10(1), 21. doi: 10.1186/s13041-017-0303-1
- 729 Vattikuti, S., & Chow, C. C. (2010). A computational model for cerebral cortical  
730 dysfunction in autism spectrum disorders. *Biol Psychiatry*, 67(7), 672-678. doi:  
731 10.1016/j.biopsych.2009.09.008
- 732 Walsh, J. J., Christoffel, D. J., Heifets, B. D., Ben-Dor, G. A., Selimbeyoglu, A., Hung, L.  
733 W., . . . Malenka, R. C. (2018). 5-HT release in nucleus accumbens rescues social  
734 deficits in mouse autism model. *Nature*, 560(7720), 589-594. doi:  
735 10.1038/s41586-018-0416-4
- 736 Wan JX, Peng WL, Li XL, Qian TG, Song K, Zeng JZ, et al. A genetically encoded GRAB  
737 sensor for measuring serotonin dynamics in vivo. *Biorxiv*. 2020; 38:569-580;  
738 posted February 25, 2020; doi: 10.1101/2020.02.24.962282.
- 739 Wang, L., Zhu, Z., Hou, W., Zhang, X., He, Z., Yuan, W., . . . Tai, F. (2019). Serotonin  
740 Signaling Through Prelimbic 5-HT1A Receptors Modulates CSDS-Induced  
741 Behavioral Changes in Adult Female Voles. *Int J Neuropsychopharmacol*, 22(3),  
742 208-220. doi: 10.1093/ijnp/pyy093
- 743 Weber, E. T., & Andrade, R. (2010). Htr2a Gene and 5-HT(2A) Receptor Expression in the  
744 Cerebral Cortex Studied Using Genetically Modified Mice. *Front Neurosci*, 4. doi:  
745 10.3389/fnins.2010.00036

- 746 Yizhar, O., Fenno, L. E., Prigge, M., Schneider, F., Davidson, T. J., O'Shea, D. J., . . .  
747 Deisseroth, K. (2011). Neocortical excitation/inhibition balance in information  
748 processing and social dysfunction. *Nature*, *477*(7363), 171-178. doi:  
749 10.1038/nature10360
- 750 Young, K. S., Parsons, C. E., Stein, A., & Kringelbach, M. L. (2015). Motion and emotion:  
751 depression reduces psychomotor performance and alters affective movements in  
752 caregiving interactions. *Front Behav Neurosci*, *9*, 26. doi: 10.3389/fnbeh.2015.00026
- 753 Yu, P., An, S., Tai, F., Zhang, X., He, F., Wang, J., . . . Wu, R. (2012). The effects of neonatal  
754 paternal deprivation on pair bonding, NAcc dopamine receptor mRNA  
755 expression and serum corticosterone in mandarin voles. *Horm Behav*, *61*(5),  
756 669-677. doi: 10.1016/j.yhbeh.2012.02.028
- 757 Yuan, Y., Wu, W., Chen, M., Cai, F., Fan, C., Shen, W., . . . Hu, J. (2019). Reward Inhibits  
758 Paraventricular CRH Neurons to Relieve Stress. *Curr Biol*, *29*(7), 1243-1251 e1244.  
759 doi: 10.1016/j.cub.2019.02.048
- 760 Zhao, S., Ting, J. T., Atallah, H. E., Qiu, L., Tan, J., Gloss, B., . . . Feng, G. (2011). Cell  
761 type-specific channelrhodopsin-2 transgenic mice for optogenetic dissection of  
762 neural circuitry function. *Nat Methods*, *8*(9), 745-752. doi: 10.1038/nmeth.1668
